# Supplementary material for: Near-infrared luminescent xerogel materials covalently bonded with ternary lanthanide [Er(iii), Nd(iii), Yb(iii), Sm(iii)] complexes
Source: Royal Society of Chemistry journal article supplement (doi:10.1039/b819644c), 2009-01-01
Supplement: b819644c.pdf [file b819644c.pdf]

## Supporting Information

### Near-infrared Luminescent Xerogel Materials Covalently Bonded with Ternary Lanthanide [Er(III), Nd(III), Yb(III), Sm(III)] Complexes

Jing Feng,<sup>ab</sup> Jiang-Bo Yu,<sup>a</sup> Shu-Yan Song,<sup>ab</sup> Li-Ning Sun,<sup>a</sup> Wei-Qiang Fan,<sup>ab</sup>

Xian-Min Guo,<sup>ab</sup> Song Dang,<sup>ab</sup> and Hong-Jie Zhang\*<sup>a</sup>

<sup>a</sup> *State Key Laboratory of Rare Earth Resource Utilization, Changchun Institute of Applied Chemistry, Chinese Academy of Sciences, Changchun 130022, P. R. China*

<sup>b</sup> *Graduate School of the Chinese Academy of Sciences, Beijing, P. R. China*

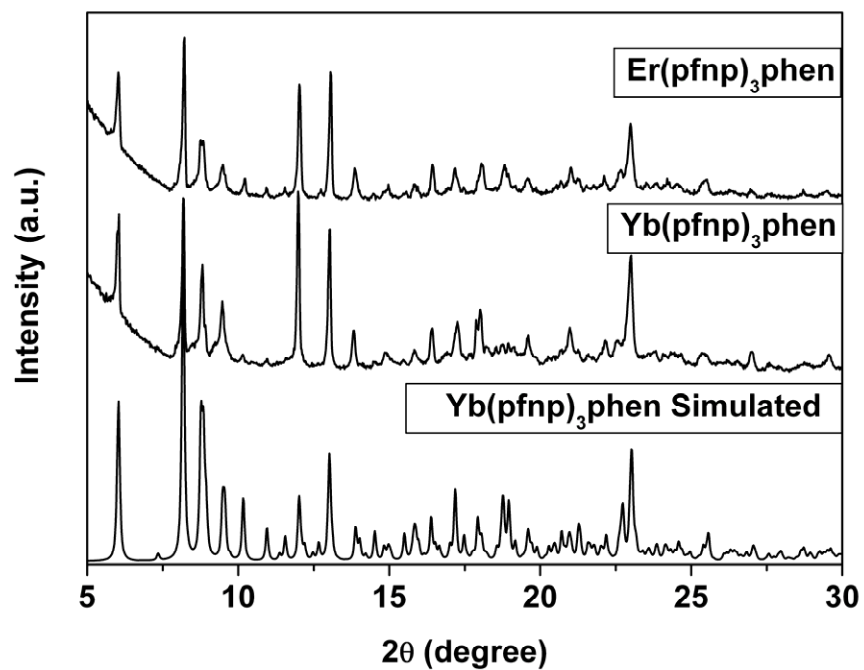

**Fig. S1** XRD patterns of  $\text{Er(pfnp)}_3\text{phen}$ ,  $\text{Yb(pfnp)}_3\text{phen}$  and  $\text{Yb(pfnp)}_3\text{phen}$  simulated.

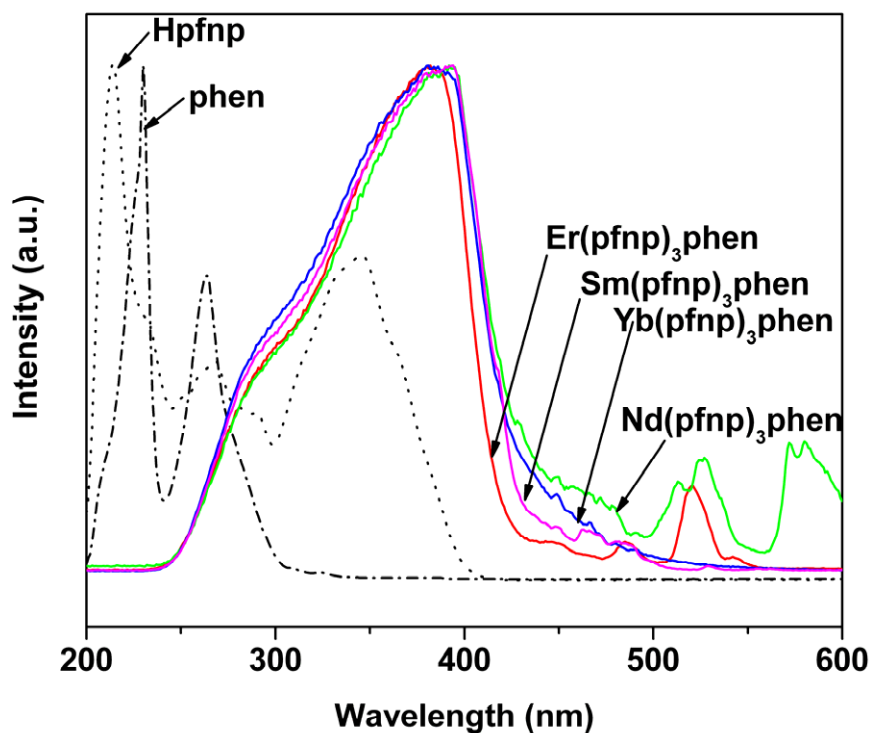

**Fig. S2** UV-vis absorption spectra of Hpfnp and phen ligands and excitation spectra of Er(pfnp)<sub>3</sub>phen ( $\lambda_{em} = 1533$  nm), Nd(pfnp)<sub>3</sub>phen ( $\lambda_{em} = 1058$  nm), Yb(pfnp)<sub>3</sub>phen ( $\lambda_{em} = 978$  nm) and Sm(pfnp)<sub>3</sub>phen ( $\lambda_{em} = 950$  nm) complexes. The ligands are at  $5 \times 10^{-4}$  M in ethanol, and the complexes are in solid state.

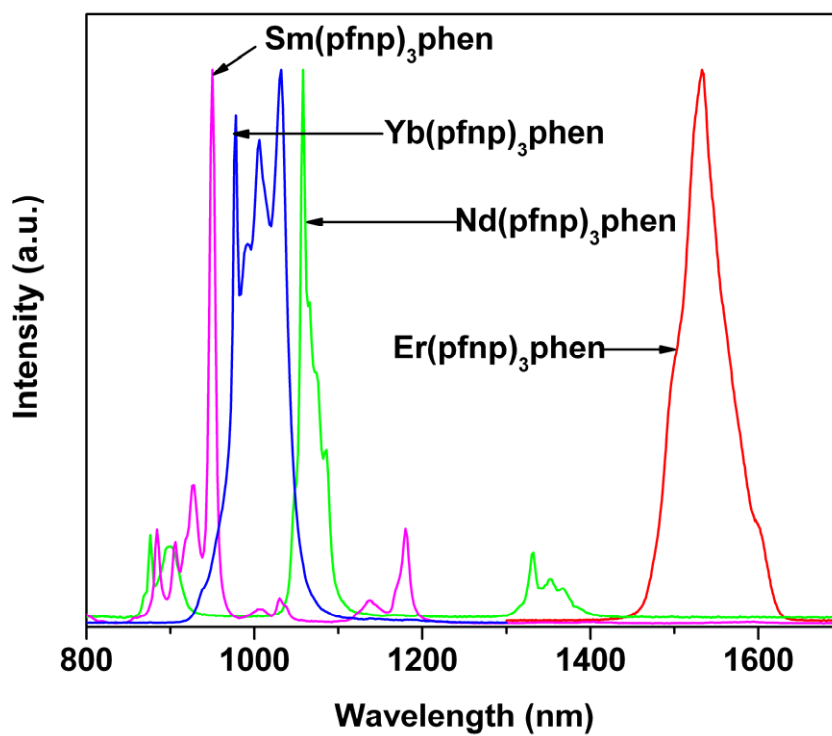

**Fig. S3** Emission spectra of Er(pfnp)<sub>3</sub>phen ( $\lambda_{\text{ex}} = 380$  nm), Nd(pfnp)<sub>3</sub>phen ( $\lambda_{\text{ex}} = 390$  nm), Yb(pfnp)<sub>3</sub>phen ( $\lambda_{\text{ex}} = 380$  nm) and Sm(pfnp)<sub>3</sub>phen ( $\lambda_{\text{ex}} = 385$  nm) complexes.

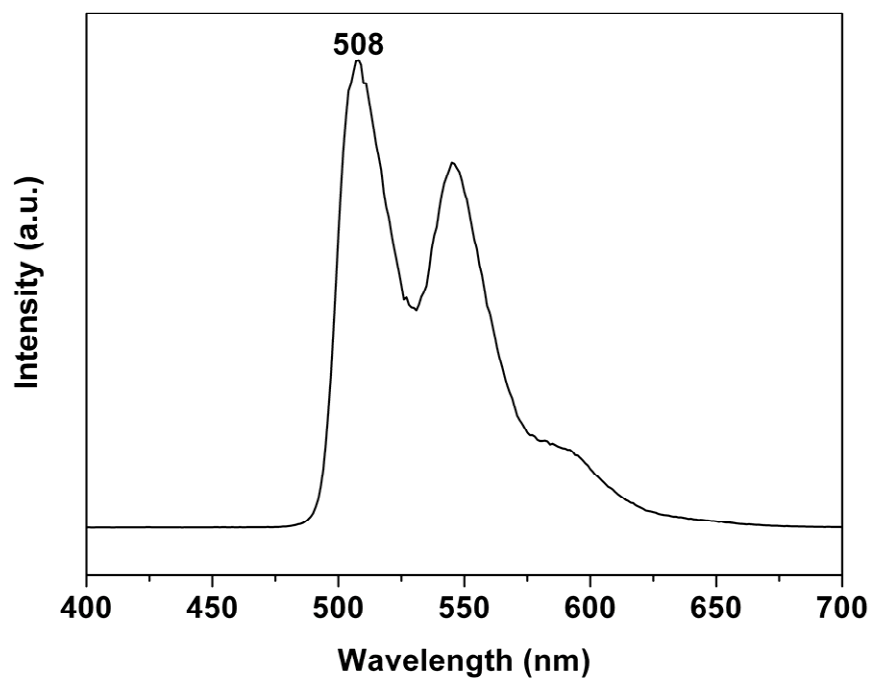

**Fig. S4** The phosphorescence spectra of Gd(pfnp)<sub>3</sub>(H<sub>2</sub>O)<sub>2</sub> complex ( $\lambda_{\text{ex}} = 342$  nm), was measured at 77 K after a delay time of 1 s.

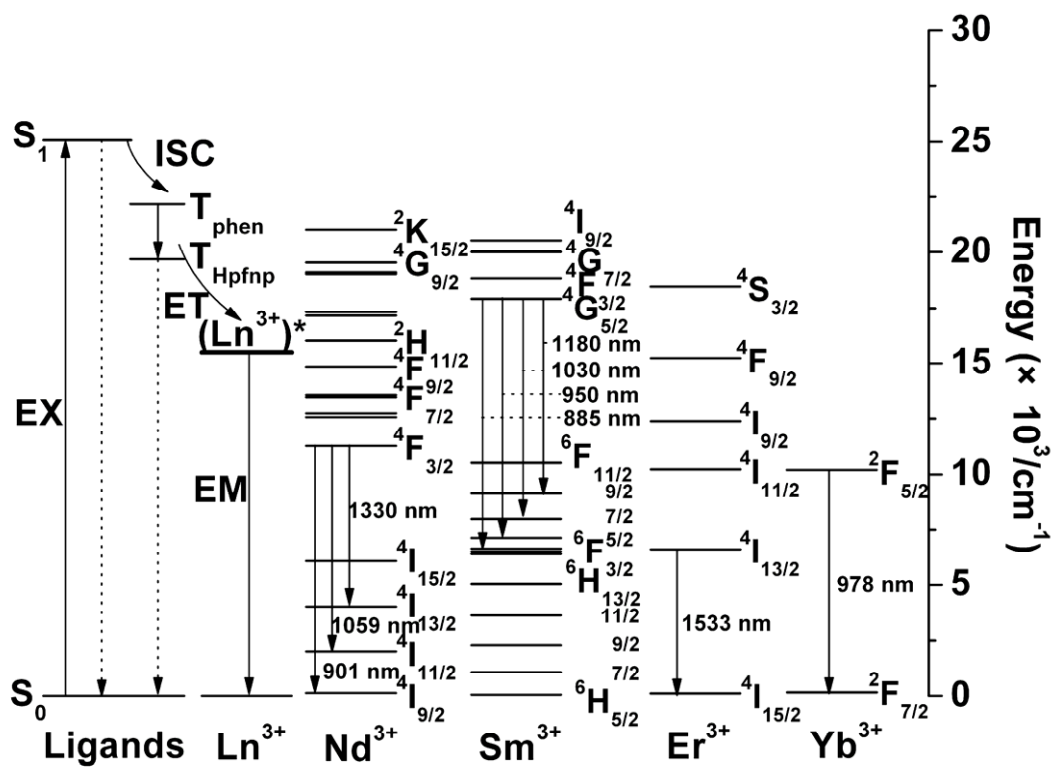

**Fig. S5** Energy levels and the energy transfer processes in the Ln-ligand system (Ln = Er, Nd, Yb, Sm). (EX: excitation; EM: emission; ISC: intersystem crossing; ET: energy transfer.)
